# Supplementary material for: TREM-1–expressing intestinal macrophages crucially amplify chronic inflammation in experimental colitis and inflammatory bowel diseases
Source: JCI journal article supplement (doi:10.1172/jci30602), 2007-09-13
Supplement: sd1 [file 1]

## Supplementary Figures

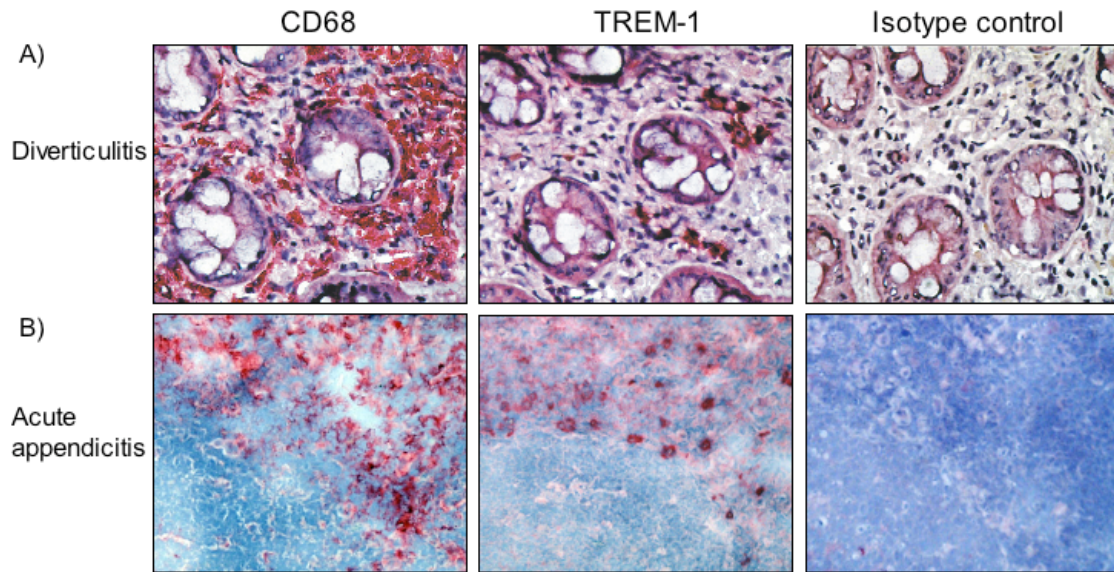

### Supplementary Figure S1

**TREM-1 expressing macrophages are increased during acute inflammatory reactions in the intestine.** Serial frozen tissue sections from (A) diverticulitis and (B) acute appendicitis patients were stained in parallel for CD68 and TREM-1. An isotype matched irrelevant mAb was used as a negative control. Stainings are representative for 3 patients with diverticulitis and for 6 patients with acute appendicitis (magnification: 40x).

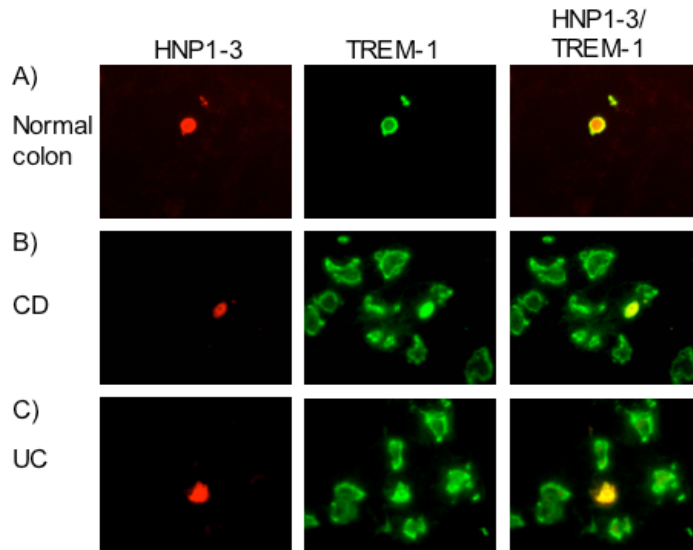

### Supplementary Figure S2

**A minor subset of neutrophils infiltrating the inflamed intestine also express TREM-1.** Frozen tissue sections of (A) normal intestinal tissues and affected tissues from (B) CD and (C) UC patients were double stained for the neutrophil marker HNP1-3 (red) and TREM-1 (green). Double positive cells represent rare TREM-1 expressing neutrophils, magnification: 100x.

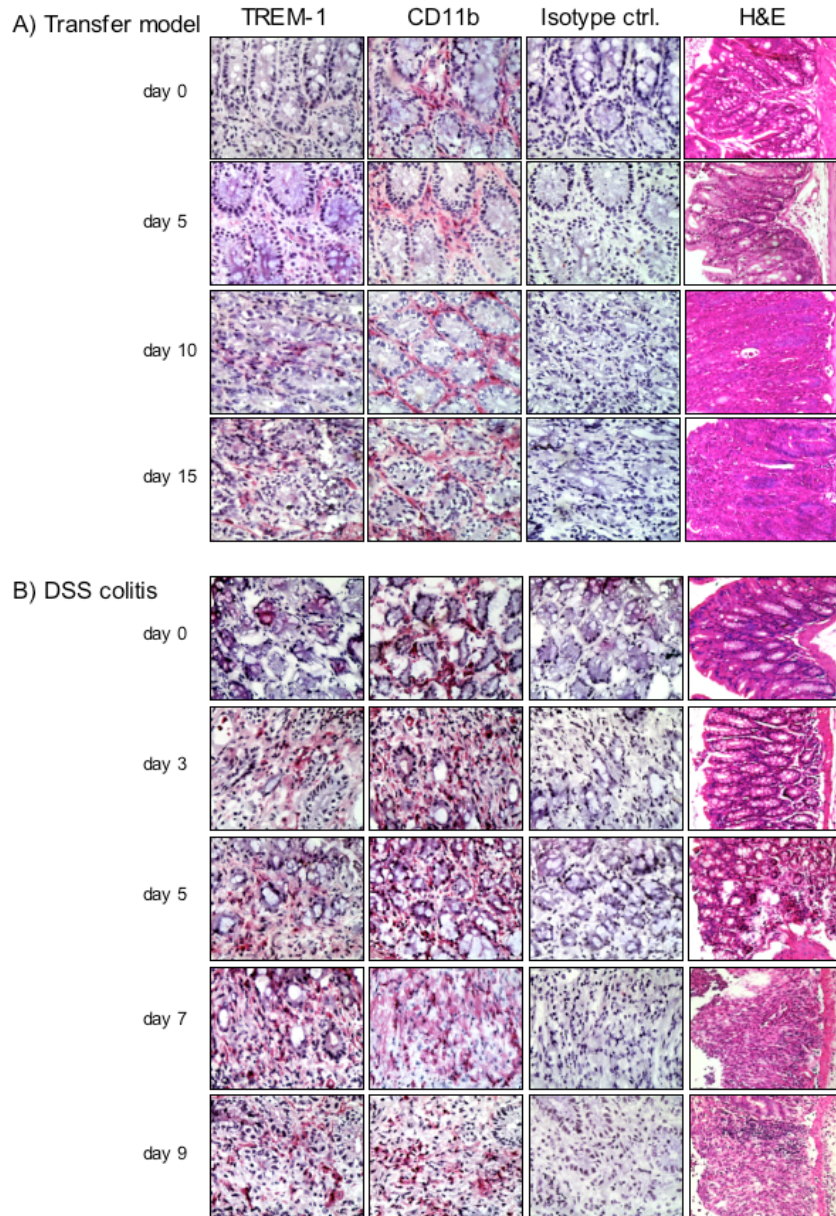

### Supplementary Figure 3

**TREM-1 expressing cells are increased in the colonic lamina propria early during induction of experimental colitis.** Serial intestinal frozen tissue sections of normal and colitic mice at different days upon (A) adoptive CD4 T cell transfer, or (B) DSS administration were analyzed in parallel by immunohistochemistry for TREM-1 and CD11b (Mac-1) expressing cells. An isotype matched control antibody of irrelevant specificity was used as a negative control (magnification: 40x). H&E stains (right column) show the kinetics of histopathological alterations upon colitis induction (magnification: 20x). Stains are representative for four different mice analyzed at each time point.

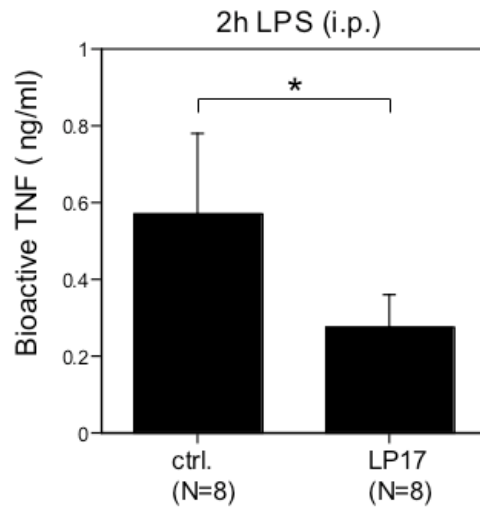

#### Supplementary Figure 4

**LP17 pretreatment reduces serum TNF levels in LPS treated mice.** C57BL/6 mice were pretreated with either an antagonistic TREM-1 peptide (LP17) or control peptide (ctrl.) (i.p. 100ug each), at 1h before i.p. injection of 150ug LPS per mouse. Mice were sacrificed 2h upon LPS administration and sera were tested for bioactive TNF in a L929 TNF bioassay. Concentrations are indicated as mean  $\pm$  SEM; \*,  $p < 0.05$ .
